# Supplementary material for: A fast-response adaptive hierarchical mode triboelectric nanogenerator for random gust energy harvesting
Source: Royal Society of Chemistry journal article supplement (doi:10.1039/d4se00869c), 2024-01-01
Supplement: d4se00869c1.pdf [file d4se00869c1.pdf]

# **Fast-response adaptive hierarchical mode triboelectric nanogenerator for the random gust energy harvesting**

Shujing Sha<sup>a</sup>, Mingjian Qin<sup>a</sup>, Xin Yu<sup>b</sup>, Zhibo Xu<sup>c</sup> and Xiaohui Lu<sup>\*a</sup>

---

<sup>a</sup> School of Mechatronic Engineering, Changchun University of Technology,  
Changchun, Jilin 130012, China.

<sup>b</sup> School of Electrical and Electronic Engineering, Changchun University of  
Technology, Changchun, Jilin 130012, China.

<sup>c</sup> College of Physics, Jilin University, Changchun 130012, China.

Supplementary Information available: [details of any supplementary information  
available should be included here]. See DOI: 10.1039/x0xx00000x

Supporting Figures:

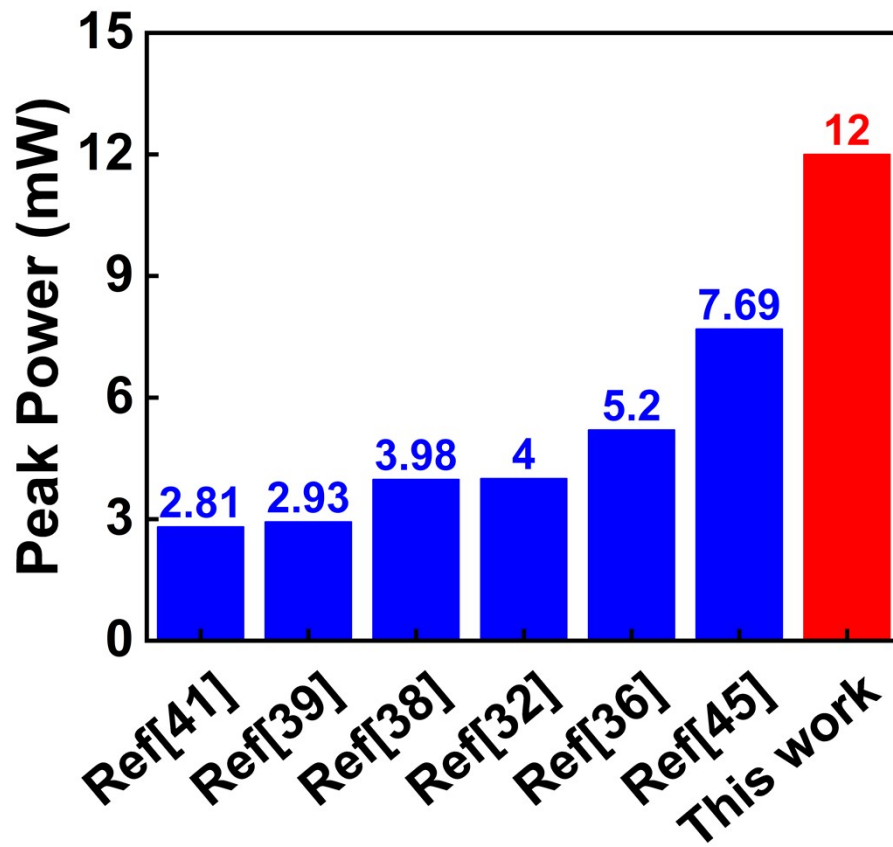

Fig. S1. The peak power compared with other wind energy harvesting TENGs.

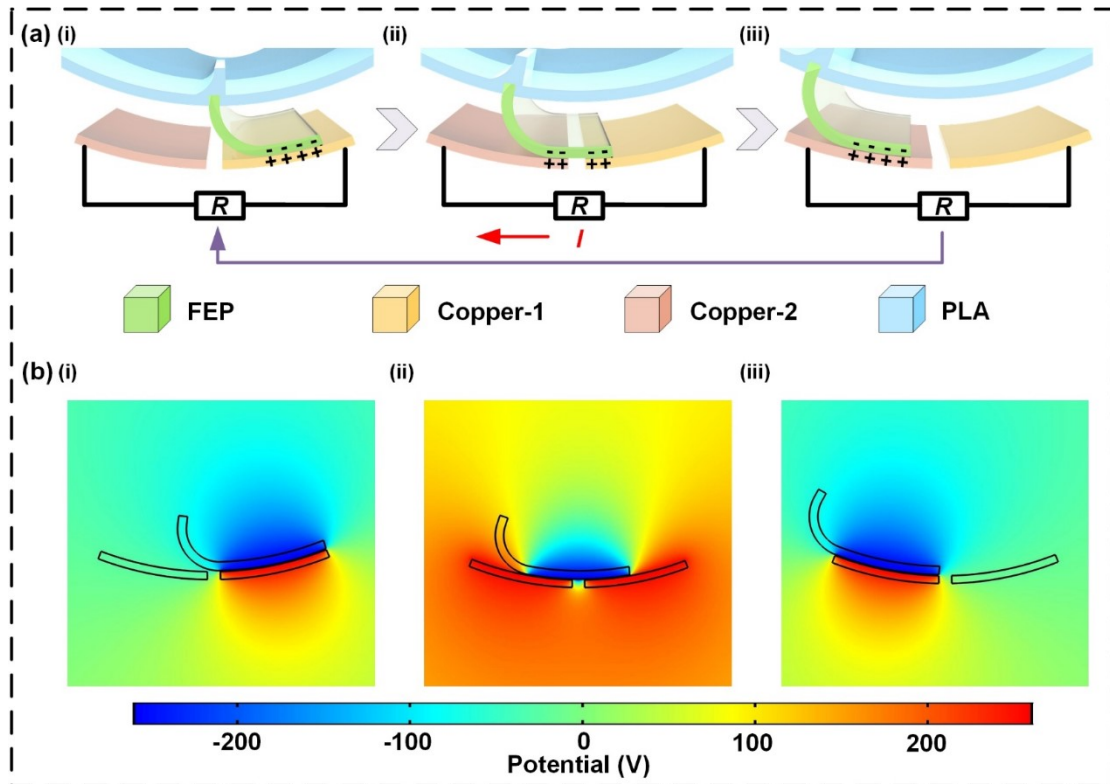

**Fig. S2. (a) Triboelectric charge transfer mechanism, (b) schematic diagram of potential simulation in three states.**

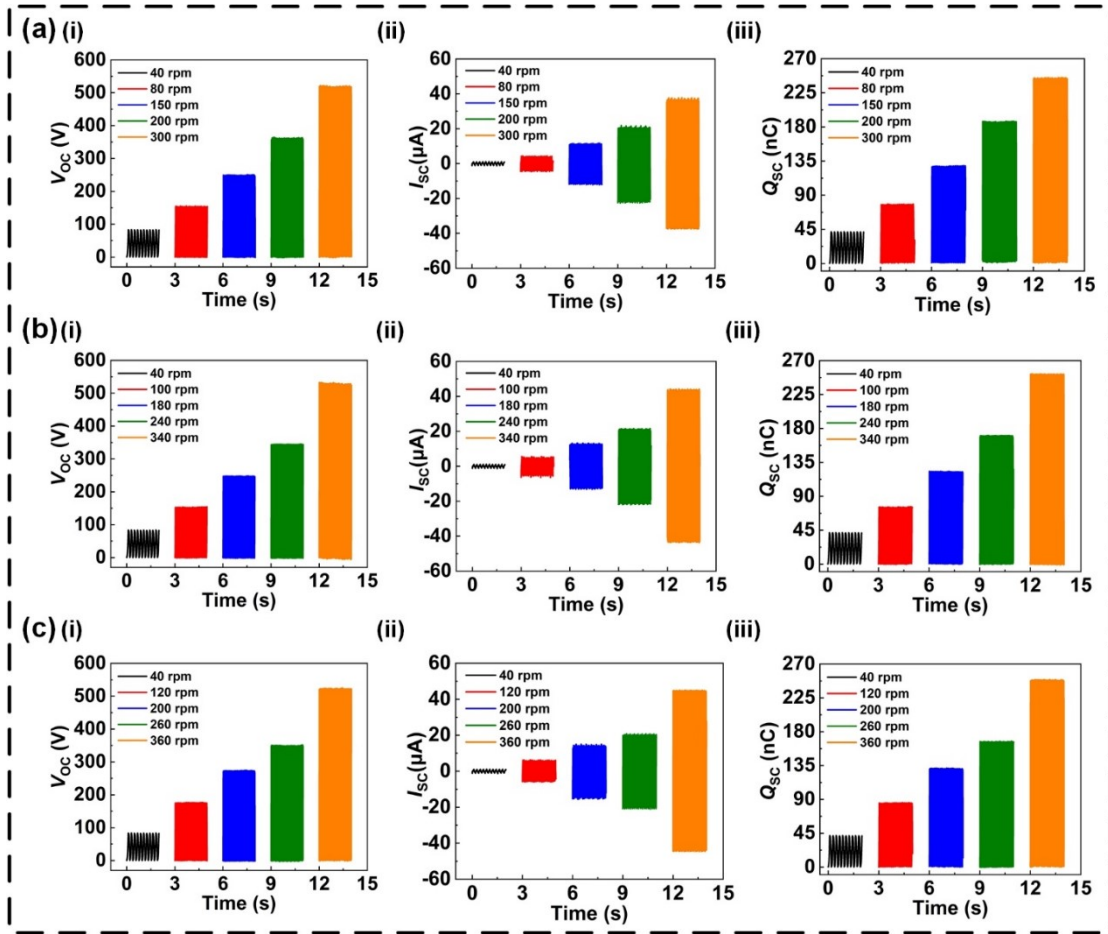

**Fig. S3. Output performance under three groups of different spring wire diameters: (a) 40-300 rpm, (b) 60-340 rpm, (c) 80-360 rpm.**

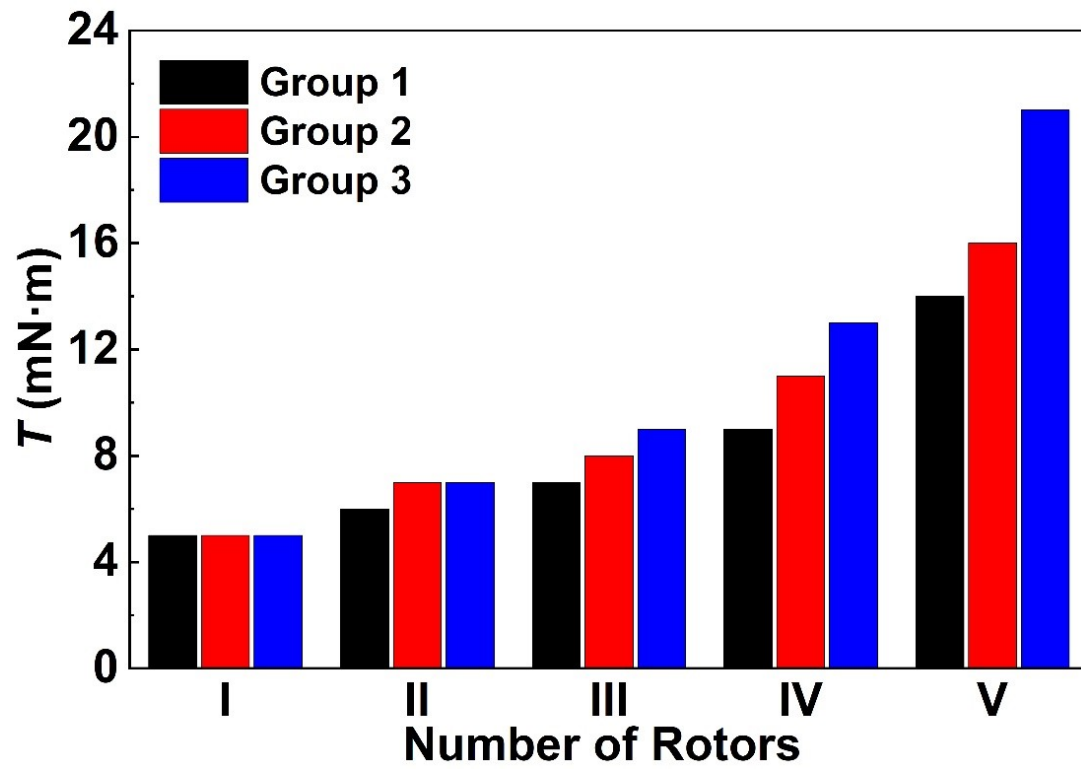

Fig. S4. Torque under three groups of different wire diameter springs.

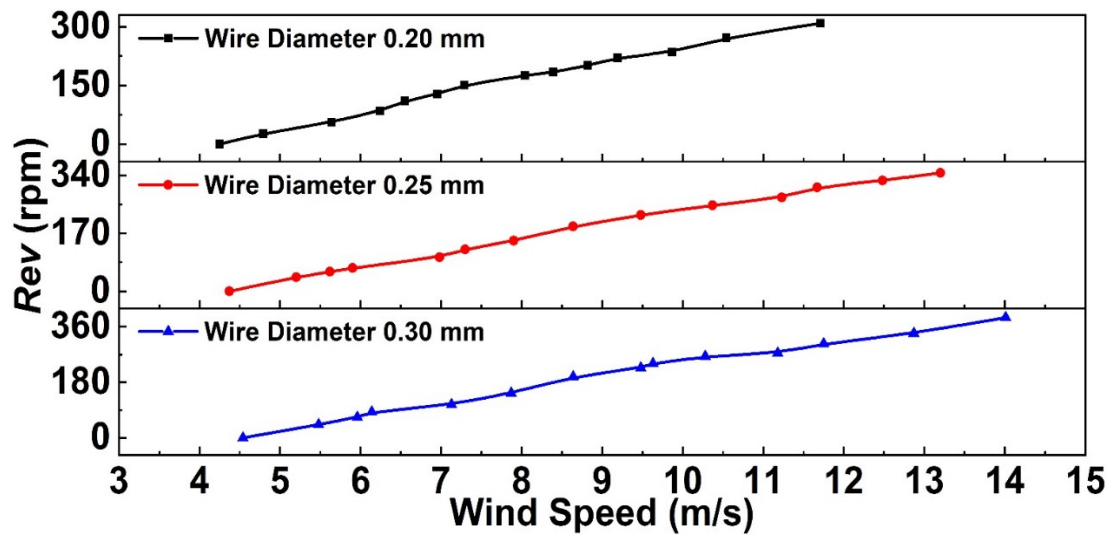

**Fig. S5.** The relationship between wind speed and rotational speed of FR-TENG under three different wire diameter springs.

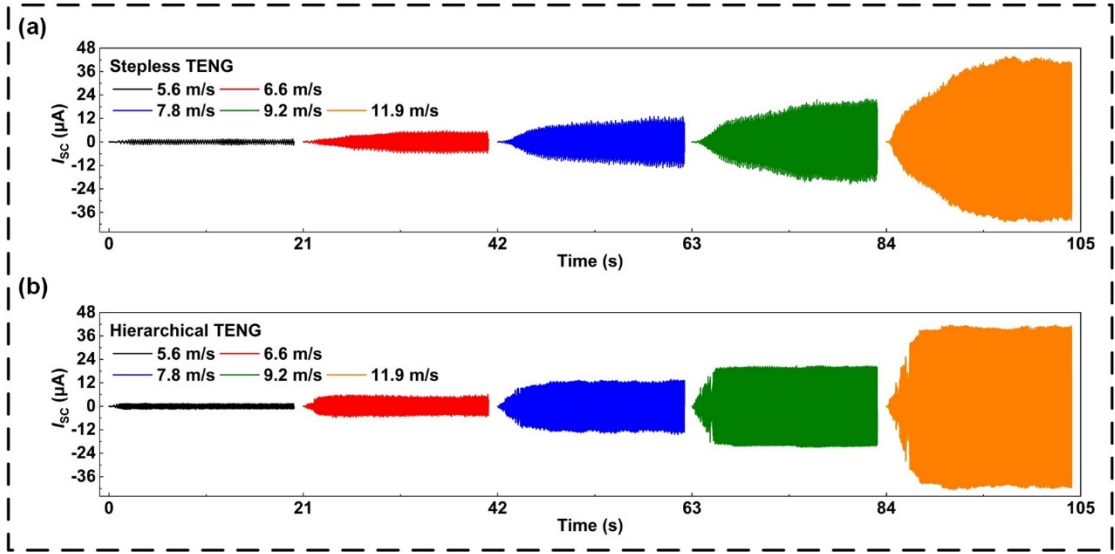

**Fig. S6. Output currents of stepless TENG and hierarchical TENG at different wind speeds.**

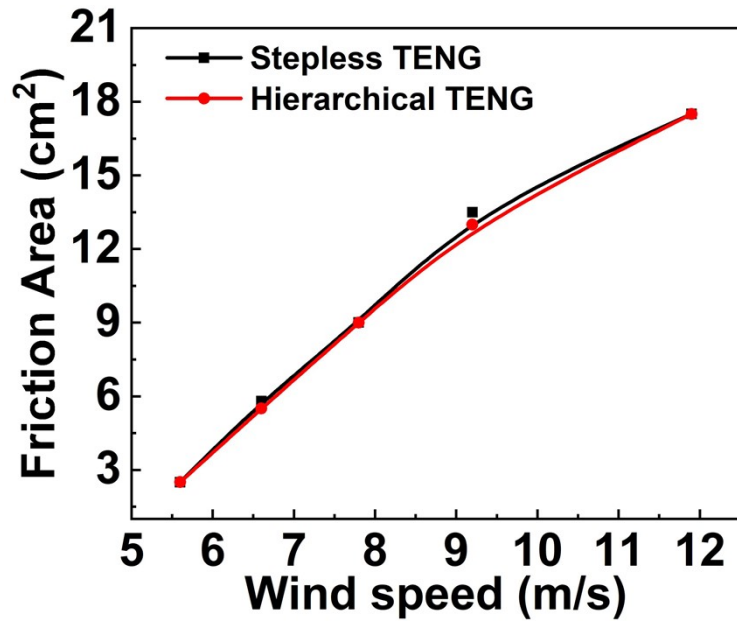

**Fig. S7. Comparison of area of stepless TENG and hierarchical TENG at different wind speeds.**



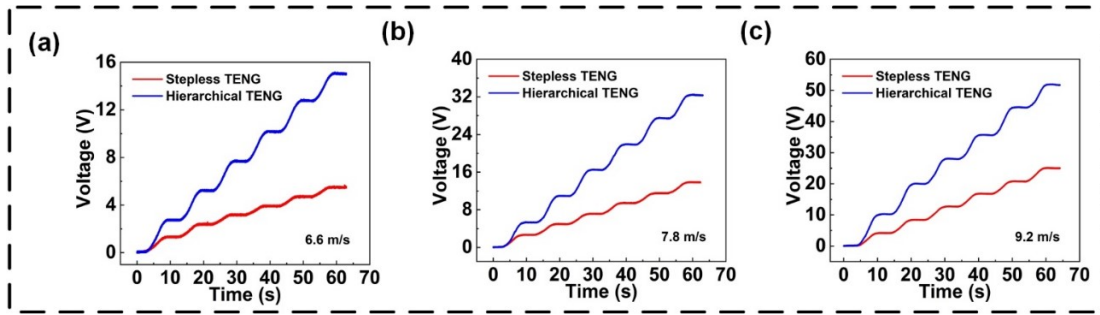

**Fig. S8. Comparison of charging capacitance curves of stepless TENG and hierarchical TENG under (a) 6.6 m/s, (b) 7.8 m/s, (c) 9.2 m/s gust.**

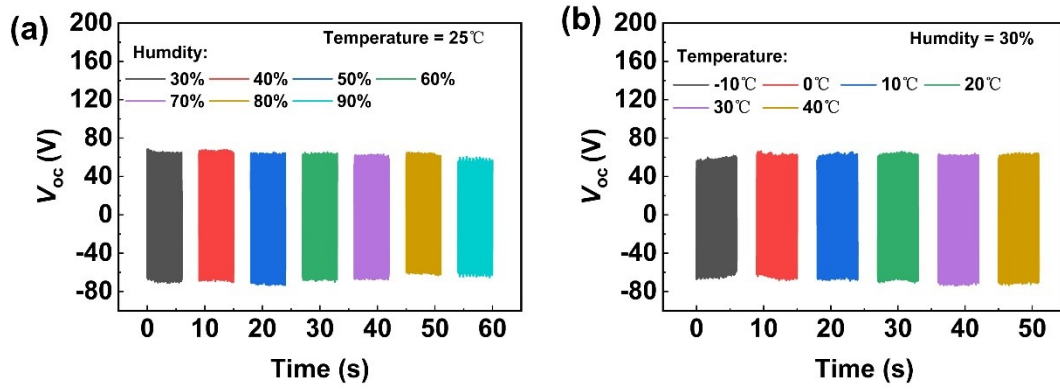

**Fig. S9. Experimental testing of FR-TENG in different temperature environments.**
